# Supplementary material for: Incidence of Alzheimer’s Disease in Men with Late-Life Hypertension Is Ameliorated by FOXO3 Longevity Genotype
Source: PubMed Central journal article supplement — J Alzheimers Dis. 2023 Aug 29;95(1):79–91. doi: 10.3233/JAD-230350 (PMC10578238; doi:10.3233/jad-230350), 2023-08-29
Supplement: jad-95-jad230350-s001.pdf [file jad-95-jad230350-s001.pdf]

## Supplementary Material

### Incidence of Alzheimer's Disease in Men with Late-Life Hypertension Is Ameliorated by *FOXO3* Longevity Genotype

**Supplementary Table 1.** The effect (HR and 95% CI) of late-life BP variables on incident all-cause dementia and Alzheimer's disease from stratified analyses (in which separate analyses were performed for each *FOXO3* *rs2802292* genotype), adjusted for midlife hypertension.

| Genotype                  | BP variable | All cause dementia |              | Alzheimer's disease |               |
|---------------------------|-------------|--------------------|--------------|---------------------|---------------|
|                           |             | HR (95% CI)*       | <i>p</i>     | HR (95% CI)         | <i>p</i>      |
| <i>TG/GG</i><br>(n=1,259) | HTN1        | 0.80 (0.60-1.07)   | 0.14         | 0.68 (0.49-0.95)    | <b>0.024</b>  |
|                           | HTN2        | 0.77 (0.59-0.99)   | <b>0.044</b> | 0.65 (0.48-0.88)    | <b>0.0052</b> |
|                           | SBP≥140     | 0.85 (0.65-1.09)   | 0.20         | 0.71 (0.53-0.96)    | <b>0.027</b>  |
|                           | SBP≥160     | 0.78 (0.60-1.00)   | <b>0.049</b> | 0.61 (0.45-0.83)    | <b>0.0019</b> |
|                           | DBP≥90      | 0.70 (0.51-0.94)   | <b>0.019</b> | 0.53 (0.36-0.77)    | <b>0.001</b>  |
|                           | DBP≥95      | 0.63 (0.42-0.95)   | <b>0.026</b> | 0.52 (0.32-0.86)    | <b>0.011</b>  |
| <i>TT</i><br>(n=1,429)    | HTN1        | 1.13 (0.86-1.48)   | 0.37         | 1.06 (0.77-1.46)    | 0.70          |
|                           | HTN2        | 1.12 (0.89-1.41)   | 0.34         | 1.22 (0.93-1.60)    | 0.14          |
|                           | SBP≥140     | 1.06 (0.84-1.33)   | 0.65         | 1.03 (0.79-1.36)    | 0.81          |
|                           | SBP≥160     | 1.13 (0.89-1.44)   | 0.32         | 1.11 (0.83-1.48)    | 0.49          |
|                           | DBP≥90      | 1.14 (0.87-1.51)   | 0.34         | 1.24 (0.90-1.70)    | 0.19          |
|                           | DBP≥95      | 0.72 (0.46-1.14)   | 0.16         | 0.70 (0.40-1.22)    | 0.21          |

\*HR and 95% CI of effect of blood pressure variables on incident all-cause dementia and Alzheimer's disease were estimated from the multivariate Cox models adjusted for baseline variables: age, education (years), *APOE* ε4, CASI score, BMI, plasma glucose, smoking (pack-year), alcohol drinking (ounces/month), physical activity index, and prevalent diabetes, CHD, stroke, depressive symptoms, and midlife BP variable that used the same definition as the late-life BP variable in the model.

**Supplementary Table 2.** Effect of *FOXO3* longevity genotype (*TG/GG*) on risk posed by hypertension diagnosed in midlife (T-HTN-ML) and of hypertension diagnosed in late life (T-HTN-LL) for all-cause dementia and of Alzheimer’s disease.

| Genotype                  | BP variable      | Reference        | All-cause dementia (704) |              | Alzheimer’s disease (501) |              |
|---------------------------|------------------|------------------|--------------------------|--------------|---------------------------|--------------|
|                           |                  |                  | HR (95% CI)              | <i>p</i>     | HR (95% CI)               | <i>p</i>     |
| <i>TG/GG</i><br>(n=1,224) | T-HTN-ML (n=479) | NMT (n=258)      | 1.23 (0.92-1.66)         | 0.16         | 1.10 (0.79-1.55)          | 0.56         |
|                           | T-HTN-LL (n=487) | NMT (n=258)      | 0.92 (0.68-1.25)         | 0.59         | 0.79 (0.56-1.12)          | 0.19         |
|                           | T-HTN-LL (n=487) | T-HTN-ML (n=479) | 0.75 (0.59-0.95)         | <b>0.017</b> | 0.72 (0.54-0.96)          | <b>0.025</b> |
| <i>TT</i><br>(n=1,387)    | T-HTN-ML (n=539) | NMT (303)        | 1.45 (1.09-1.92)         | 0.01         | 1.29 (0.93-1.80)          | 0.13         |
|                           | T-HTN-LL (545)   | NMT (303)        | 1.21 (0.91-1.60)         | 0.18         | 1.17 (0.85-1.62)          | 0.33         |
|                           | T-HTN-LL (545)   | T-HTN-ML (n=539) | 0.84 (0.66-1.05)         | 0.13         | 0.91 (0.69-1.20)          | 0.50         |

HR was estimated from multivariate Cox models adjusted for baseline variables: age, education (years), CASI score, prevalent stroke, and *APOE*  $\epsilon$ 4 genotype.

NMT, normotensive at both examination 3 and 4; T-HTN-ML, SBP/DBP  $\geq$ 140/90 or on anti-hypertensives at examination 3 (1971–1975), hypertension diagnosed in midlife; T-HTN-LL, normotensive at examination 3 and SBP/DBP  $\geq$ 140/90 or on anti-hypertensives at examination 4 (1991–1993), HTN diagnosed in late-life.

**Supplementary Table 3.** The effect of late-life BP variables on incident all-cause dementia and Alzheimer’s disease from stratified analyses by *FOXO3* rs2802292 genotypes, excluding incident all-cause dementia cases within 1.5 years of follow-up.

| Genotype                  | BP variable | All cause dementia |              | Alzheimer’s disease |               |
|---------------------------|-------------|--------------------|--------------|---------------------|---------------|
|                           |             | HR (95% CI)*       | <i>p</i>     | HR (95% CI)         | <i>p</i>      |
| <i>TG/GG</i><br>(n=1,240) | HTN1        | 0.85 (0.64-1.12)   | 0.24         | 0.72 (0.52-0.99)    | <b>0.040</b>  |
|                           | HTN2        | 0.82 (0.64-1.04)   | 0.096        | 0.69 (0.52-0.92)    | <b>0.011</b>  |
|                           | SBP≥140     | 0.81 (0.63-1.05)   | 0.11         | 0.68 (0.50-0.91)    | <b>0.0096</b> |
|                           | SBP≥160     | 0.76 (0.59-0.98)   | <b>0.037</b> | 0.60 (0.44-0.82)    | <b>0.0013</b> |
|                           | DBP≥90      | 0.76 (0.56-1.01)   | 0.062        | 0.58 (0.40-0.84)    | <b>0.0038</b> |
|                           | DBP≥95      | 0.66 (0.44-0.99)   | <b>0.044</b> | 0.56 (0.34-0.92)    | <b>0.022</b>  |
| <i>TT</i><br>(n=1,395)    | HTN1        | 1.12 (0.86-1.45)   | 0.39         | 1.09 (0.81-1.46)    | 0.59          |
|                           | HTN2        | 1.06 (0.84-1.33)   | 0.62         | 1.13 (0.87-1.47)    | 0.37          |
|                           | SBP≥140     | 1.06 (0.84-1.35)   | 0.60         | 1.04 (0.79-1.36)    | 0.80          |
|                           | SBP≥160     | 1.14 (0.88-1.46)   | 0.32         | 1.08 (0.80-1.45)    | 0.61          |
|                           | DBP≥90      | 1.22 (0.92-1.60)   | 0.17         | 1.29 (0.94-1.76)    | 0.12          |
|                           | DBP≥95      | 0.71 (0.44-1.14)   | 0.16         | 0.71 (0.41-1.24)    | 0.23          |

\*HR and 95% CI of effect of blood pressure variables on incident all-cause dementia and Alzheimer’s disease were estimated from the multivariate Cox models adjusted for baseline variables: age, education (years), *APOE* ε4, CASI score, BMI, plasma glucose, smoking (pack-year), alcohol drinking (ounces/month), physical activity index, and prevalent diabetes, CHD, stroke, depressive symptoms.
